# Supplementary material for: A novel gene, MdSSK1, as a component of the SCF complex rather than MdSBP1 can mediate the ubiquitination of S-RNase in apple
Source: PubMed Central journal article supplement (PMC4071834; doi:10.1093/jxb/eru164), 2014-04-23
Supplement: supp_eru164_jexbot120097_file001.pdf [file supp_eru164_jexbot120097_file001.pdf]

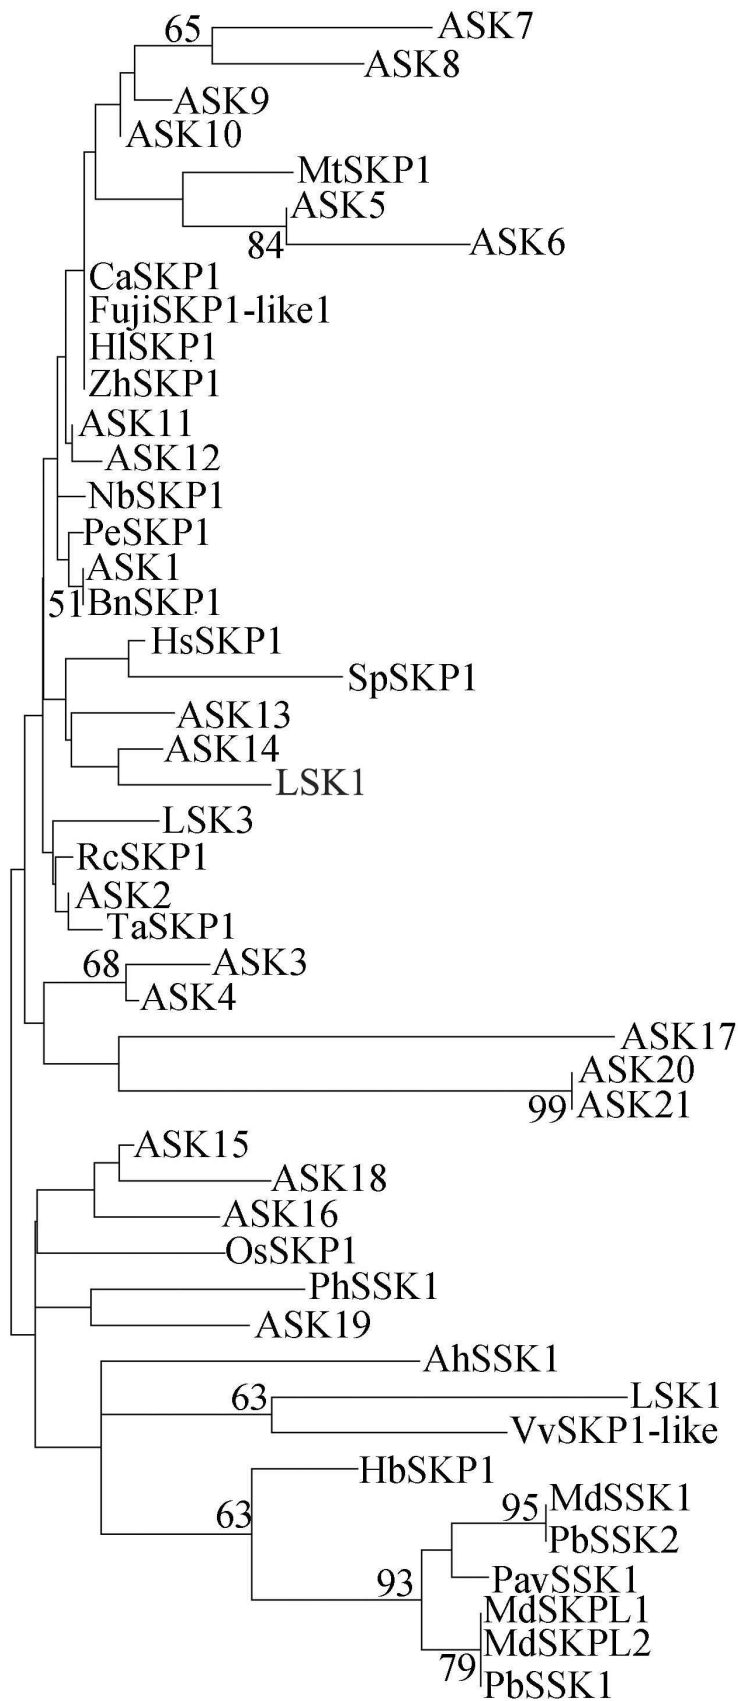

—|

0.1

**Supplemental Figure 1** A NJ tree of plant SKP1-like proteins. The deduced amino acid sequences were from Arabidopsis (ASK1-21), Brassica napus (BnSkp1), Zantedeschia hybrid cultivar (ZhSkp1), Humulus lupulus (HISkp1), Capsicum annuum (CaSkp1), Fuji(FujiSkp1-like), Medicago truncatula (MtSkp1), Nicotiana benthamiana (NbSkp1), Pellia endiviifolia (PeSKP1), Triticum aestivum (TaSkp1), Oryza sativa (OsSkp1), Ricinus communis (RcSkp1), human (HsSkp1), Schizosaccharomyces pombe (SpSkp1), Petunia hybrida (PhSSK1), Antirrhinum majus (AhSSK1), Lilium longiflorum (LSK1-3), Vitis vinifera (VvSKP1-like), Hevea brasiliensis (HbSkp1), Pyrus (PbSSK1-2), Prunus (PavSSK1). The NJ tree was generated with 1,000 bootstrap replicates, and bootstrap values of 50% and above are given at branch nodes.

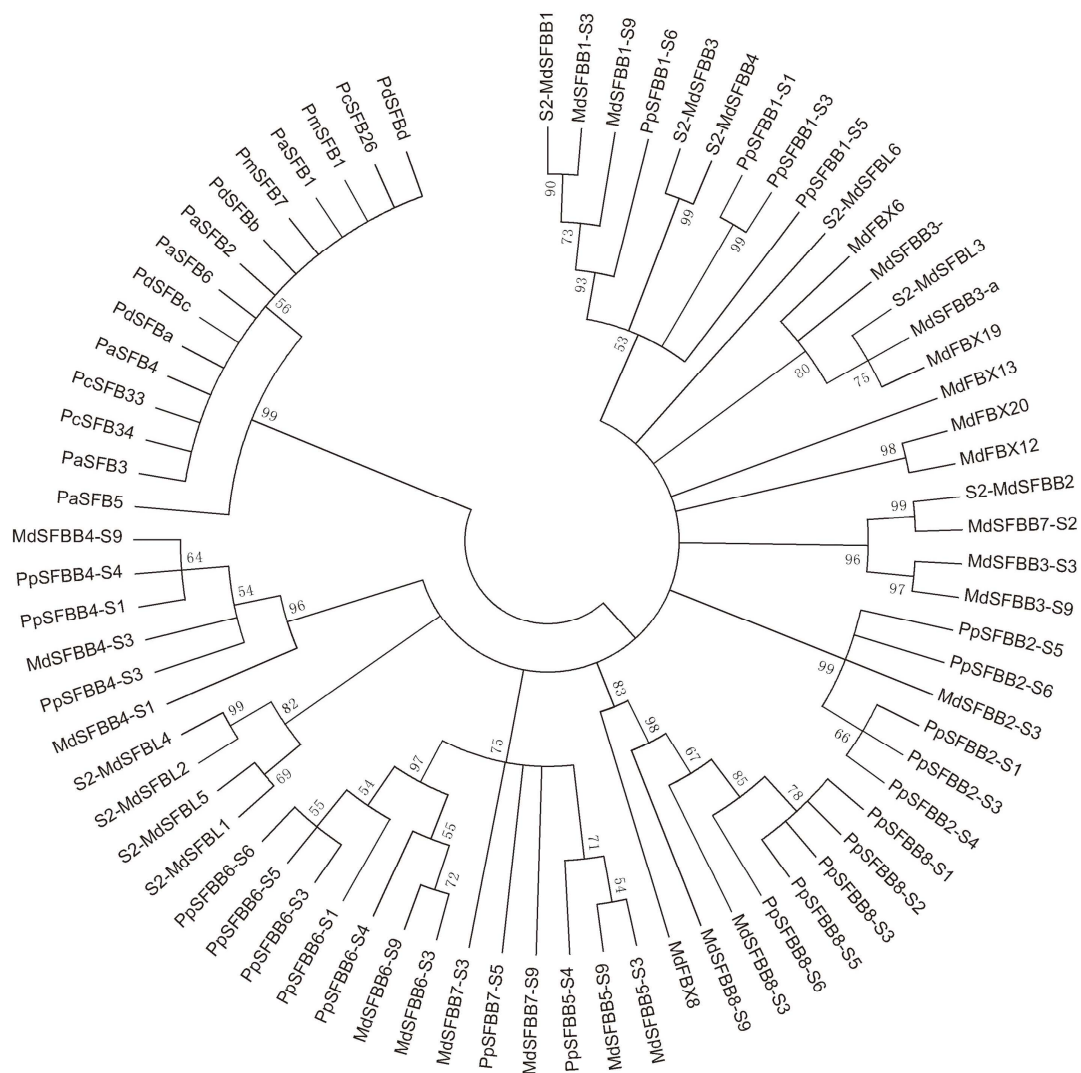

**Supplemental Figure 2** Phylogenetics analysis of the SFBB genes of *Malus*, *Pyrus pyrifolia*, *P. avium*, *P. cerasus*, *P. dulcis*, *P. mume*. The phylogenetic tree was constructed using the Neighbor-Joining method. Numbers on the branches indicate bootstrap values >50%.

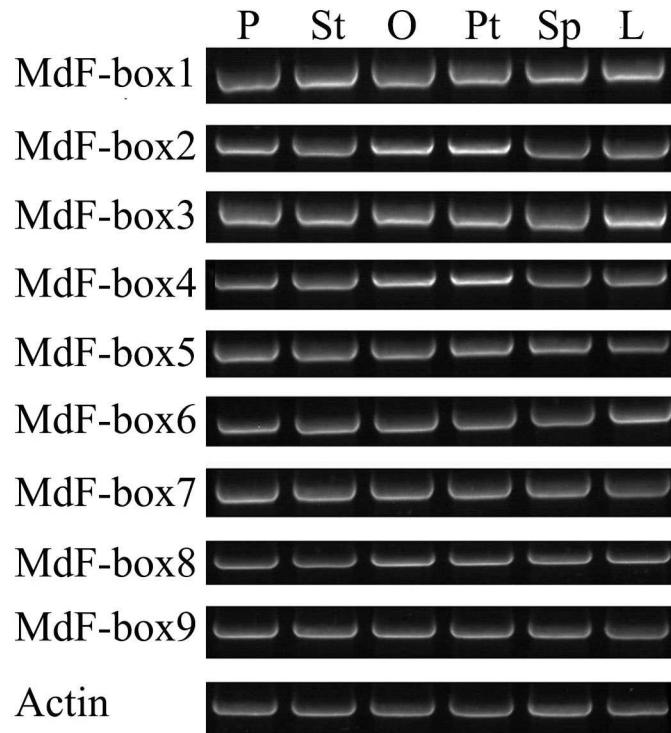

**Supplemental Figure 3** The expression patterns of MdF-box1-9. Total RNAs were extracted from different organs. The synthesized cDNA were used as templates in RT-PCR. L, Leaves; Sp, sepals; Pt, petals; O, ovaries; St, styles; p, pollen.

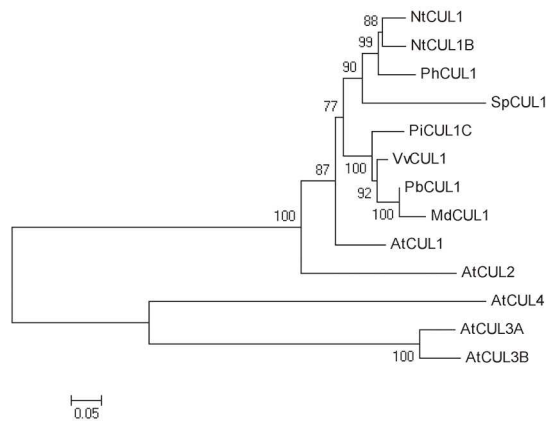

**Supplemental Figure 4** A NJ tree of plant CUL1-like proteins. Arabidopsis(AtCUL1-4), tobacco(NtCUL1A-1B), tomato(SpCUL1), Vitis(VvCUL1), Petunia(PhCUL1,PiCUL1C, PiCUL1G). The NJ tree was generated with 1,000 bootstrap replicates, and bootstrap values of 50% and above are given at branch nodes.

**A**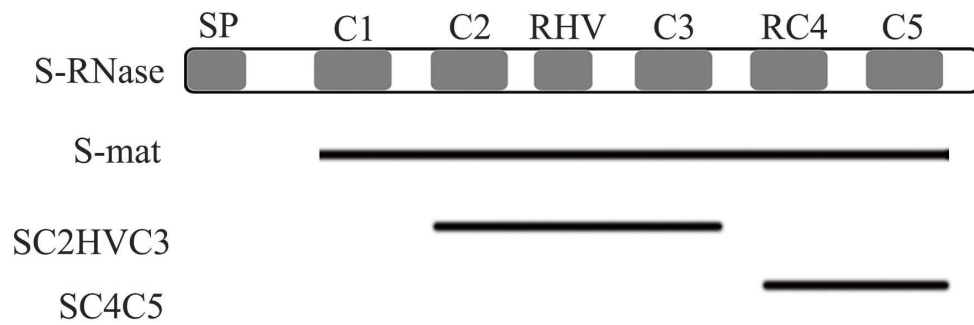**B**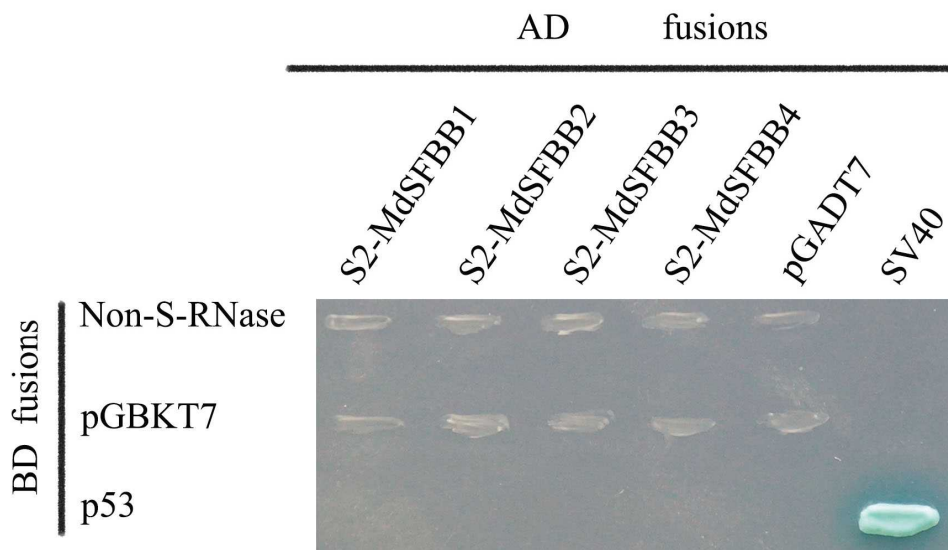

**Supplemental Figure 5** Schematic diagram of S-RNase constructed in Y2H analysis and the interaction between non-S-RNase and *S2-MdSFBB1-4*. (A) C1, C2, C3, RC4 and C5 represent five conserved domains and RHV the hypervariable region, SP meant the signal peptide in Rosaceae S-RNases. (B) Y2H assays between non-S-RNase and *S2-MdSFBB1-4*. The AD fusions and BD fusions were co-transformed into yeast strain AH109. Transformants were grown on selective medium SD/- Ade - His - Leu - Trp for 7 days at 30°C and then were stained by X- $\alpha$ -gal. The p53 and SV40 were used as positive controls, the pGBKT7 and pGADT7 as negative controls.

**A**

|        |                                                                                   |     |
|--------|-----------------------------------------------------------------------------------|-----|
| MdSBP1 | MALPQHFFQQHYPQQQQQQQ...QQQSKSFRNLYTI.DGQLSPAVAYYDPGNLQDHPQQHPPYVPPFHVGEFAGPVAAT   | 77  |
| ScSBP1 | MALPHHHLQLHI...QQQPHQQQSKSYRDLYNMMDGQITTPVVYFNGSNLPEQS.QHPPYIPPFQVVGLAPGTAD..     | 72  |
| NaSBP1 | MALPHHHLQLHS...IQQQ...QQQSNFRDIYNMMDGQISTPVAYFNGSNLPEQS.QHPPYIPAFQVVGLAPGPAD..    | 70  |
| PiSBP1 | MALPHHHLQLHI...QQQP...QQQSKSYRDIYNMMDGQISTPVAYFNGSNLPEQS.QHPPYIPPFQVVGLAPGLVD..   | 70  |
| PhSBP1 | ...GTSHLQLHI...QQQP...QQQSKSYRDIYNMMDGQISTPVAYFNGSNLPEQS.QHPPYIPPFQVVGLAPGLVD..   | 67  |
|        |                                                                                   |     |
| MdSBP1 | DGSDNGADLQWHYGFESKRKRLKEQDFLENNNSQISSIDFLQPRSVSTGLGLSLDNT.RMVSTGDSSLLSVIGDDVDHELQ | 156 |
| ScSBP1 | ...DGGLDLQWNYGLEPKKRRPKEQDFMENNSQISSVDLQRRSVSTGLGLSLDNGRLASSCDSAFGLVGDIERELQ      | 149 |
| NaSBP1 | ...EGGLDLQWNYGLEPKKRRPKEQDFLENNNSQISSVDLQRRSVSTGLGLSLDNGRLGSCGDSAFGLVGDIERELQ     | 147 |
| PiSBP1 | ...DGGLDLQWNYGLEPKKRRPKEQDFLENNNSQISSIDFLQPRSVSTGLGLSLDNGRLASSGDSAFGLVGDIERELQ    | 147 |
| PhSBP1 | ...DGGLDLQWNYGLEPKKRRPKEQDFLENNNSQISSIDFLQPRSVSTGLGLSLDNGRLASSGDSAFGLVGDIERELQ    | 144 |
|        |                                                                                   |     |
| MdSBP1 | RQDAEIDRFLKAQGDRLRQTILDKVQATQLQTLSEVDEKVLRLKREKEAEVESISKKNMELEEQMEQLAVEAGAWQQIAR  | 236 |
| ScSBP1 | RQDAEIDRYIKVQGDRLRQAVLEKQANQIQAITVVEEKVLQKLRERDTEVDDINKKNMELELRMEQLDLEANAWQORAK   | 229 |
| NaSBP1 | RQDADIDRYIKVQGDRLRQAILEKQANQLQITTCVVEEKVIQKLRKEAEVEDINKKNMELELRMEQLALEANAWQORAK   | 227 |
| PiSBP1 | RQDAEIDRYIKVQGDRLRQAILEKQANQLQTVTYVEEKVIQKLRKEETEVEDINKKNMELELRTEQLALEANAWQORAK   | 227 |
| PhSBP1 | RQDAEIDRYIKVQGDRLRQAILEKQANQLQTVTYVEEKVIQKLRKEETEVEDINKKNMELELRTEQLALEANAWQORAK   | 224 |
|        |                                                                                   |     |
| MdSBP1 | RNENMISSLRFNLQHVYAQSRDSKEGCGDSEVDDTASCNGRINLDMFRKENNDGKEMMTCKACRVNEVCMLLLPCKHL    | 316 |
| ScSBP1 | YNENLINTLKVNLQHVYAQSRDSKEGCGDSEVDDTASCNGRATDLHLLCRDSKEMKELMTCVCRVNEVCMLLLPCKHL    | 309 |
| NaSBP1 | YNENLINTLKVNLQHVYAQSRDSKEGCGDSEVDDTASCNGRATDFHLLCRDSNEMKELMTCVCRVNEVCMLLLPCKHL    | 307 |
| PiSBP1 | YNENLINTLKVNLQHVYAQSRDSKEGCGDSEVDDTASCNGRATDLHLLCRDSNEMKELMTCVCRVNEVCMLLLPCKHL    | 307 |
| PhSBP1 | YNENLINTLKVNLQHVYAQSRDSKEGCGDSEVDDTASCNGRATDLHLLCRDSNEMKELMTCVCRVNEVCMLLLPCKHL    | 304 |
|        |                                                                                   |     |
| MdSBP1 | CLCKDCESKLSVCPLCQSSKFIGMEVFY                                                      | 344 |
| ScSBP1 | CLCKECESKLSLCLCQSTKYIGMEVYM                                                       | 337 |
| NaSBP1 | CLCKECESKLSLCLCQSTKYIGMEVYV                                                       | 335 |
| PiSBP1 | CLCKECESKLSLCLCQSTKYIGMEIYM                                                       | 335 |
| PhSBP1 | CLCKECESKLSLCLCQSTKYIGMEIYM                                                       | 332 |

**B**

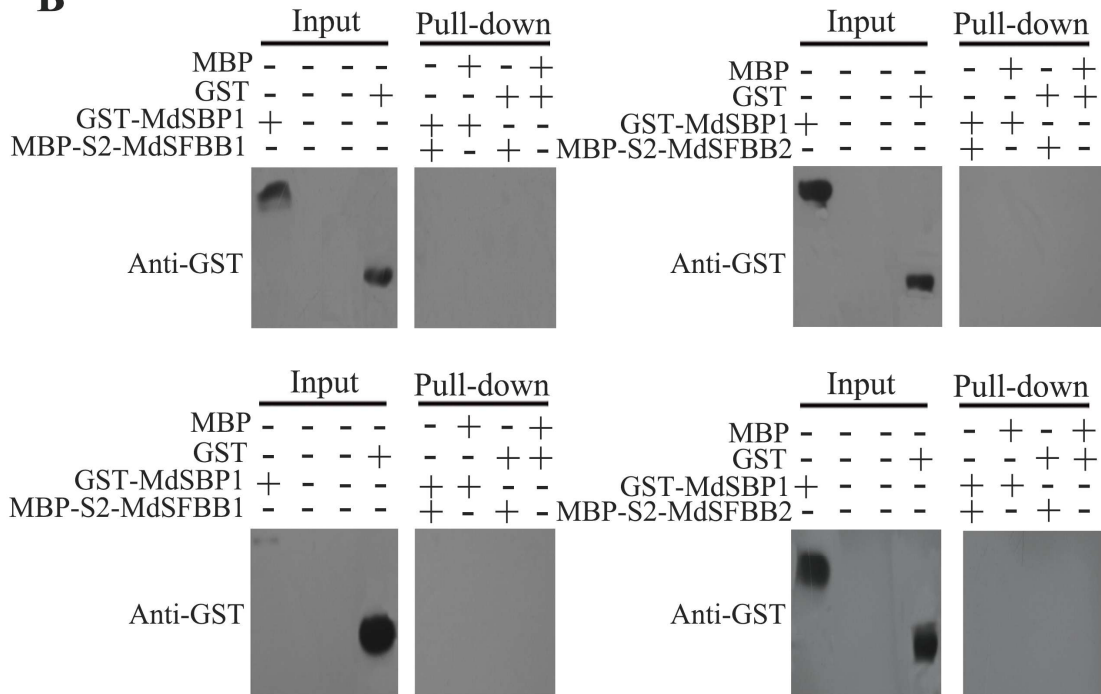

**Supplemental Figure 6** The structure of MdSBP1 and pull-down analysis between MdSBP1 and S2-MdSFBB1-4. (A) Sequence alignment and structural elements of MdSBP1 and other SBP1 proteins. The pentagrams indicate the conserved cysteines. NaSBP1, PiSBP1, PhSBP1, ScSBP1, MdSBP1(from this study). (B) pull-down analysis between MdSBP1 and S2-MdSFBB1-4. Purified S2-MdSFBB1-4 were used as bait against purified GST-MdSBP1. Bound proteins were examined with anti-GST

antibody. GST and MBP were used as negative controls.

**A**

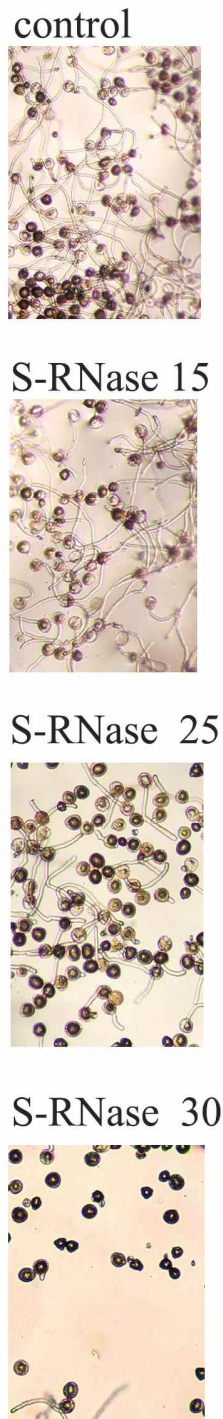

**B**

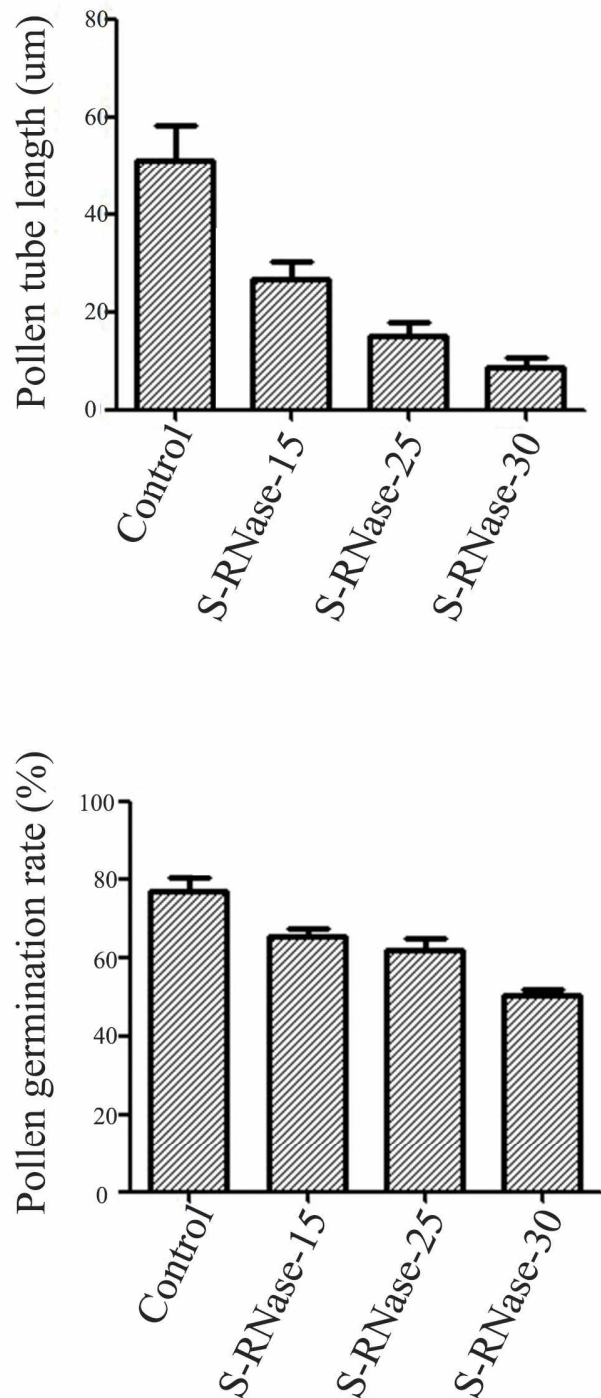

**Supplemental Figure 7** The pollen germination and pollen tube length after treated with *S*-RNase. (A) Pollen growth status with different concentration *S*-RNase treated. (B) The pollen germination rate (3 replicated with 100-pollen grains,  $p < 0.01$ ) and

pollen tube length (3 replicated with 100-pollen grains,  $p < 0.01$ ) under different treatment by S-RNase.

**The Primers used for analysis of expression pattern**

| <b>Primer</b> | <b>Sequence</b>              |
|---------------|------------------------------|
| S2-MdSFBB1-F  | ATAGCAGGGACAAGTCTTATTGATAA   |
| S2-MdSFBB1-R  | AAAATCTCTA ACTTCATTG GAATA   |
| S2-MdSFBB2-F  | AATCTTCCATTGATAGTGATGTACAT   |
| S2-MdSFBB2-R  | GAAAAGCCCCAAAATAAGCCAACT     |
| S2-MdSFBB3-F  | CTTCATTGATAAATGTTCTT         |
| S2-MdSFBB3-R  | GGATTCACCC TTCGAAATGTTG      |
| S2-MdSFBB4-F  | CAGTCGCAAGATCAAGAAGT         |
| S2-MdSFBB4-R  | CTAAATCAAATGAAAGTATGTATT     |
| S2-MdSFBL1-F  | ATGGAATACCATCATCCTGTATTGATTC |
| S2-MdSFBL1-R  | TGACTGATT CATTATACAGA AAAAGA |
| S2-MdSFBL2-F  | GTTCTTGAATTGTTTCGGAATTAAC    |
| S2-MdSFBL2-R  | ATTCCTCCAA GATCCACTTCTTT     |
| S2-MdSFBL3-F  | TGTGTGTCAAAGTGAATCTCTA       |
| S2-MdSFBL3-R  | TATGAACAATACTTTTTACATAA      |
| S2-MdSFBL4-F  | TGGAAGACCATCATCCTGTAGT       |
| S2-MdSFBL4-R  | TGAGAAAAGGAGGTGGAGAACG       |
| S2-MdSFBL5-F  | ACCCCTGCAGATAAGGCGGTCGAA     |
| S2-MdSFBL5-R  | TTACTTGATAGGAACAATAGTTTCC    |
| S2-MdSFBL6-F  | GGTGCATGAAAATGAAACTCTT       |
| S2-MdSFBL6-R  | ATGAAACAATACTTTTCACATAC      |

Supplemental Table 1
